# Supplementary material for: Dynamic genome evolution in a model fern
Source: PubMed Central journal article supplement (PMC9477723; doi:10.1038/s41477-022-01226-7), 2022-09-01
Supplement: 41477_2022_1226_MOESM1_ESM.pdf [file 41477_2022_1226_MOESM1_ESM.pdf]

---

**Supplementary information**

---

**Dynamic genome evolution in a model fern**

---

In the format provided by the  
authors and unedited

## Dynamic genome evolution in a model fern

D. Blaine Marchant<sup>1,4\*</sup>, Guang Chen<sup>2,3†</sup>, Shengguan Cai<sup>4,5†</sup>, Fei Chen<sup>6</sup>, Peter Schafraan<sup>7</sup>, Jerry Jenkins<sup>8</sup>, Shengqiang Shu<sup>9</sup>, Chris Plott<sup>8</sup>, Jenell Webber<sup>8</sup>, John T. Lovell<sup>8,9</sup>, Guifen He<sup>9</sup>, Laura Sandor<sup>9</sup>, Melissa Williams<sup>8</sup>, Shanmugam Rajasekar<sup>10</sup>, Adam Healey<sup>8</sup>, Kerrie Barry<sup>9</sup>, Yinwen Zhang<sup>11</sup>, Emily Sessa<sup>12</sup>, Rijan R. Dhakal<sup>13</sup>, Paul G. Wolf<sup>13</sup>, Alex Harkess<sup>8,14</sup>, Fay-Wei Li<sup>7,15</sup>, Clemens Rössner<sup>16</sup>, Annette Becker<sup>16</sup>, Lydia Gramzow<sup>17</sup>, Dawei Xue<sup>6</sup>, Yuhuan Wu<sup>6</sup>, Tao Tong<sup>3</sup>, Yuanyuan Wang<sup>18</sup>, Fei Dai<sup>4</sup>, Shuijin Hua<sup>19</sup>, Hua Wang<sup>20</sup>, Shengchun Xu<sup>4</sup>, Fei Xu<sup>4</sup>, Honglang Duan<sup>21</sup>, Günter Theißen<sup>17</sup>, Michael R. McKain<sup>22</sup>, Zheng Li<sup>23</sup>, Michael T.W. McKibben<sup>24</sup>, Michael S Barker<sup>24</sup>, Robert J. Schmitz<sup>25</sup>, Dennis Stevenson<sup>26</sup>, Cecilia Zumajo-Cardona<sup>26</sup>, Barbara A. Ambrose<sup>26</sup>, James H. Leebens-Mack<sup>27\*</sup>, Jane Grimwood<sup>8\*</sup>, Jeremy Schmutz<sup>8,9\*</sup>, Pamela S. Soltis<sup>28\*</sup>, Douglas E. Soltis<sup>12,28\*</sup>, Zhong-Hua Chen<sup>5,29\*</sup>

<sup>1</sup>Department of Biology, Stanford University, Stanford, CA, 94305, USA

<sup>2</sup>Central Laboratory, State Key Laboratory for Managing Biotic and Chemical Threats to the Quality and Safety of Agro-products, Zhejiang Academy of Agricultural Sciences, Hangzhou, 310021, China

<sup>3</sup>College of Agriculture, Yangtze University, Jingzhou, 434025, China

<sup>4</sup>College of Agriculture and Biotechnology, Zhejiang University, Hangzhou 310058, China

<sup>5</sup>School of Science, Western Sydney University, Penrith, NSW 2751, Australia

<sup>6</sup>College of Life and Environmental Sciences, Hangzhou Normal University, Hangzhou, China

<sup>7</sup>Boyce Thompson Institute, Ithaca, NY 14853, USA

<sup>8</sup>Genome Sequencing Center, HudsonAlpha Institute for Biotechnology, Huntsville, AL 35806, USA

<sup>9</sup>United States Department of Energy Joint Genome Institute, Lawrence Berkeley National Laboratory, Berkeley, CA 94720, USA

<sup>10</sup>Arizona Genomics Institute, School of Plant Sciences, University of Arizona, Tucson, AZ 85721, USA

<sup>11</sup>Institute of Bioinformatics, University of Georgia, Athens, GA 30602, USA

<sup>12</sup>Department of Biology, University of Florida, Gainesville, FL 32611, USA

<sup>13</sup>Department of Biological Sciences, University of Alabama in Huntsville, Huntsville, AL 35899, USA

<sup>14</sup>Department of Crop, Soil, and Environmental Sciences, Auburn University, Auburn, AL 36849, USA

<sup>15</sup>Plant Biology Section, Cornell University, Ithaca, NY 14853, USA

<sup>16</sup>Justus-Liebig-University, Department of Biology and Chemistry, Institute of Botany, Heinrich-Buff-Ring 38, 35392 Gießen, Germany

<sup>17</sup>Matthias Schleiden Institute/Genetics, Friedrich Schiller University Jena, Philosophenweg 12, 07743 Jena, Germany

<sup>18</sup>Hubei Insect Resources Utilization and Sustainable Pest Management Key Laboratory, College of Plant Science and Technology, Huazhong Agricultural University, Wuhan, 430070, China

<sup>19</sup>Institute of Crops and Nuclear Technology Utilization, Zhejiang Academy of Agricultural Sciences, Hangzhou, China

<sup>20</sup>State Key Laboratory for Managing Biotic and Chemical Threats to the Quality and Safety of Agro-products, Institute of Virology and Biotechnology, Zhejiang Academy of Agricultural Sciences, Hangzhou 310021, China

<sup>21</sup>Institute for Forest Resources & Environment of Guizhou, Key Laboratory of Forest Cultivation in Plateau Mountain of Guizhou Province, College of Forestry, Guizhou University, Guiyang 550025, China

<sup>22</sup>Department of Biological Sciences, University of Alabama, Tuscaloosa, AL 35487, USA

<sup>23</sup>Department of Integrative Biology, University of Texas at Austin, Austin, TX 78712, USA

<sup>24</sup>Department of Ecology and Evolutionary Biology, University of Arizona, Tucson, AZ 85721, USA

<sup>25</sup>Department of Genetics, University of Georgia, Athens, GA 30602, USA

<sup>26</sup>New York Botanical Garden, Bronx, NY 10458, USA

<sup>27</sup>Department of Plant Biology, University of Georgia, Athens, GA 30602, USA

<sup>28</sup>Florida Museum of Natural History, University of Florida, Gainesville, FL 32611, USA

<sup>29</sup>Hawkesbury Institute for the Environment, Western Sydney University, Penrith, NSW, Australia

49  
50  
51  
52  
53  
54  
55  
56  
57  
58  
59  
60  
61  
62  
63  
64  
65  
66  
67  
68  
69  
70  
71  
72  
73  
74  
75  
76  
77  
78  
79  
80  
81  
82  
83  
84  
85  
86  
87

## SUPPLEMENTARY INFORMATION

- **Supplementary Discussion**
  - *Abiotic stress response gene repertoire in ferns*
  - *Evolution of the APETALA2 gene lineage*
  - *Co-evolution of LEU- and SEU-like gene families*
  - *Evolution and selection of cell cycle gene families*
  - *Cytochrome P450 gene family diversity across green plants*
  - *Revitalizing the C-Fern Curriculum*
- **Supplementary Figure 1.** Phylogeny of *NRAMP* metal-ion transporter gene family and *Ceratopteris* *NRAMP* gene expression
- **Supplementary Figure 2.** Phylogeny of the *APETALA2/ETHYLENE RESPONSIVE FACTOR (AP2/ERF)* across land plants and expression in *Ceratopteris*
- **Supplementary Figure 3.** Co-evolution of transcriptional regulators
- **Supplementary Figure 4.** Expansion and contraction in copy number of cell cycle-related genes across green plants
- **Supplementary Figure 5.** CYP450 diversity across green plants
  
- **Supplementary Table 1.** Repeat annotation statistics of the *Ceratopteris richardii* genome assembly
- **Supplementary Table 2.** Summary statistics of the *Ceratopteris richardii* chromosome assemblies
- **Supplementary Table 3.** Classification of the detected metabolites in *Ceratopteris richardii* compared with wheat and rice
- **Supplementary Table 4.** Sequencing libraries included in the *Ceratopteris richardii* (Hn-n) genome assembly and their respective assembled sequence coverage levels in the final release
- **Supplementary Table 5.** PacBio library statistics for the libraries included in the *Ceratopteris* genome assembly and their respective assembled sequence coverage levels
- **Supplementary Table 6.** Summary statistics of the initial output of the ARROW polished MECAT assembly
- **Supplementary Table 7.** Summary statistics of the *Ceratopteris* predicted proteome
- **Supplementary Table 8.** Angiosperm sampling for Frackify analysis
- **Supplementary Table 9.** Whole genome bisulfite sequencing statistics of the *Ceratopteris* genome
- **Supplementary Table 10.** MADS-box gene locations and annotation in *Ceratopteris*
- **Supplementary Table 11.** Key metabolites (alkaloids, flavonoids and steroids) in sporophytes of *Ceratopteris*
- **Supplementary Table 12.** CYP450 diversity across green plants (taxa included in the CYP450 phylogeny are highlighted)

88 **SUPPLEMENTARY DISCUSSION**

89

90 ***Abiotic stress response gene repertoire in ferns***

91         Ferns are known for their tolerance of heavy metals and metalloids in both soil and  
92 freshwater<sup>1-4</sup>. Another *Ceratopteris* species, *C. pteridoides*, accumulates cadmium and is a viable  
93 candidate for phytoextraction and remediation of cadmium-contaminated ecosystems<sup>5</sup>. Although  
94 the genes directly controlling cadmium accumulation have not been identified, we discovered the  
95 expansion and functional diversification of the Natural Resistance-Associated Macrophage Protein  
96 (NRAMP) heavy metal transporter gene family, which has been shown to control cadmium uptake  
97 in *Arabidopsis* (Supplementary Fig. 7)<sup>6</sup>. Further analyses of heavy metal and metalloid tolerance  
98 in various fern species alongside genome-informed experimental investigations of gene function  
99 in *Ceratopteris* will expand understanding of molecular processes contributing to heavy metal  
100 hyperaccumulation in plants. With their abundant natural defenses and phytoremediation potential,  
101 ferns provide an important resource for genetic engineering of crop resistance and environmental  
102 restoration.

103

104 ***Evolution of the APETALA2 gene lineage***

105         The *APETALA2/ETHYLENE RESPONSIVE FACTOR (AP2/ERF)* family is essential to  
106 plant development across green plants and encompasses genes known to control flower, seed, and  
107 fruit development in angiosperms<sup>7</sup>. To identify the *APETALA2* and *AINTEGUMENTA* homologs  
108 in *Ceratopteris richardii*, we performed a BLAST search using homologs previously reported  
109 across land plants<sup>8,9</sup>. A total of 199 sequences was compiled and used to predict the evolutionary  
110 history of this gene lineage. Full nucleotide sequences were aligned using the online version of  
111 MAFFT<sup>10</sup> with a gap open penalty of 3.0, offset value of 0.8, and default parameters. To find the  
112 nucleotide substitution model that best fits our data, using the Akaike Information Criterion<sup>11</sup>, we  
113 used jModelTest 2<sup>12</sup>, which identified the GTRGAMMA model. RAxML v.8.0.0 was used to  
114 estimate phylogenetic relationships under a maximum likelihood (ML) framework<sup>13</sup>. The  
115 GTRGAMMA model was assigned, and a full ML search was implemented, using the autoMRE  
116 bootstrapping criterion to assess nodal support (-f a -# autoMRE option). Closely related genes  
117 from *Arabidopsis* - *ARF3* (*At2g33860*); *RAV1* (*At1g13260*); *RAV2* (*At1g25560*); *DREB1A*  
118 (*At4g25480*); *DRE1B* (*At4g25490*) - were used as the outgroup.

119         The *AP2/ERF* family is split into two major subclades, *euAP2* and *ANT*  
120 (*AINTEGUMENTA*), in which three and 11 *Ceratopteris* genes were placed, respectively  
121 (Supplementary Fig. 2). *CerAP2* was previously found to be expressed in the inner sporangium  
122 wall, young spores, and leaf vasculature during sporogenesis, based on *in situ* hybridization  
123 analyses<sup>7</sup>. We found *CerAP2* evenly expressed throughout the ten tissues, while the *Ceratopteris*  
124 *euANT* genes were more highly expressed in stem, root, and young sporophytes and the  
125 *Ceratopteris basalANT* genes were also evenly expressed throughout the different tissues  
126 (Supplementary Fig. 8).

127

128 ***Co-evolution of LEU- and SEU-like gene families***

129 Publicly available (ncbi.nlm.nih.gov, fernbase.org, congenie.org) *LEUNIG-* (*LUG*) and  
130 *SEUSS-* (*SEU*) like genes of *Amborella trichopoda*, *Arabidopsis thaliana*, *Azolla filiculoides*  
131 *Chara braunii*, *Glycine max*, *Gnetum montanum*, *Klebsormidium nitens*, *Marchantia polymorpha*,  
132 *Nicotiana tabacum*, *Oryza sativa*, *Physcomitrium patens*, *Populus trichocarpa*, *Picea abies*, *Pinus*  
133 *pinaster*, *Pseudotsuga menziesii*, *Salvinia cucullata*, *Selaginella moellendorffii*, *Taxus baccata*,  
134 *Vitis vinifera*, *Volvox carteri f. niagaiensis* and *Zea mays* were identified using BLAST<sup>14</sup>.  
135 Phylogenetic trees were constructed using amino acid sequences aligned with MAFFT using  
136 MEGA X, maximum likelihood, and automatic trimming (60% site coverage)<sup>15</sup>. Expression  
137 patterns of *Ceratopteris LUG*-like and *SEU*-like genes were generated using Heatmapper<sup>16</sup>.

138 *LUG-* and *SEU*-like genes encode for transcriptional co-regulators that interact and co-  
139 evolve even though they belong to different gene families. In flowering plants, these genes are  
140 essential for proper flower development, specifically in controlling petal shape and polarity. *LUG-*  
141 like genes of seed plants fall into two subclades, the *LEUNIG-HOMOLOG (LUH)* clade and the  
142 *LUG* clade, but all non-seed land plant sequences, including a single gene, *CrLUG*, from  
143 *Ceratopteris*, are members of the *LUG* clade only (Supplementary Fig. 9A). *SEU*-like genes of  
144 seed plants also form two clades, the *SEU* and *SEUSS*-like clades. Of the three *SEU*-like  
145 *Ceratopteris* genes, two clustered with the seed plant and bryophyte *SEU* genes, and one, *SEUSS-*  
146 like 3 (*CrSEU3*), appeared in a clade consisting only of fern sequences (Supplementary Fig. 9B).  
147 Neither the *LUG* nor the *SEU* gene families expanded or collapsed in *Ceratopteris* but both kept a  
148 moderate number of members during land plant evolution, suggesting that even after gene copies  
149 originating from a WGD are purged from the genome, the loss of one gene family member cannot  
150 be tolerated. *SEU-* and *LUG*-like *Ceratopteris* genes were expressed in sporophytic and  
151 gametophytic tissue alike, with lowest expression in sporangia and developing leaves, and highest  
152 expression in the stem, root, expanding leaf, and young sporophyte, suggesting pleiotropic  
153 functions for the members of both gene families.

154

### 155 ***Evolution and selection of cell cycle gene families***

156 Homosporous plants have on average considerably higher chromosome numbers than do  
157 heterosporous plants<sup>17,18</sup>. Presumably, this is related either to mechanisms of genome doubling or  
158 of genome downsizing, and we hypothesize there could be differences in genes associated with the  
159 cell cycle in homosporous and heterosporous plants. Thus, we analyzed genes associated with  
160 cyclin-dependent kinases and cyclins, chromatin remodeling, and spindle formation and mapped  
161 significant gene copy expansions and contractions on a phylogenetic tree of land plants for which  
162 genome sequences are available (Supplementary Fig. 10).

163 We ran Orthofinder 2.4.0<sup>19</sup> on 21 plant species representing all major clades of land plants,  
164 for which whole genomes are currently available (July 2021). We selected genes associated with  
165 cyclin-dependent kinases and cyclins<sup>20</sup> and genes associated with spindle fiber formation and  
166 chromatin remodeling directly from The *Arabidopsis* Information Resource (TAIR), using the  
167 native search function in TAIR and the search terms “spindle” and “chromatin.” We selected 143  
168 orthogroups from the output of Orthofinder and examined the evolution of gene copy number. For

169 this we used Computational Analysis of gene Family Evolution (CAFE) v5.0<sup>21</sup>, which uses a birth  
170 and death model to simulate gene family evolution. We then mapped nodes and tips that CAFE  
171 indicated had significant expansions or retractions in copy number.

172 We aligned orthogroups with MUSCLE<sup>22</sup> and synchronized the headers of the peptide  
173 orthogroup files to match the corresponding CDS files ([https://github.com/carol-](https://github.com/carol-rowe666/ortho_group_refile)  
174 [rowe666/ortho\\_group\\_refile](https://github.com/carol-rowe666/ortho_group_refile)). We then used the peptide alignments to guide the CDS alignment  
175 with pal2nal (<http://www.bork.embl.de/pal2nal/>). Gene models in *Pinus taeda* were often  
176 mismatched between CDS and peptide sequences, so this species was removed from the analysis.  
177 The pal2nal-aligned CDS files were then used to generate gene trees using IQtree2  
178 (<https://github.com/iqtree/iqtree2>). Three of the 129 orthogroups included fewer than four  
179 sequences and could not be bootstrapped for gene tree estimation. We paired the Newick outputs  
180 generated by IQtree2 with the pal2nal-generated aligned CDS orthogroups to test for selection  
181 using the absREL model built into Hyphy (<http://hyphy.org>).

182 We found no distinct patterns of changes in gene copy number in the three heterosporous  
183 lineages. However, in the lineage leading to *Ceratopteris*, we observed five gene expansion events:  
184 one associated with a cyclin and four associated with chromatin remodeling. Using HyPhy's  
185 implementation of the absREL model, one orthogroup with the largest number of *Ceratopteris*  
186 genes under selection included six genes undergoing positive selection. This orthogroup included  
187 *Arabidopsis* genes known to be involved in regulation of DNA repair, DNA binding, RNA binding,  
188 and endonuclease activity. Otherwise, most other orthogroups had no *Ceratopteris* genes with  
189 signs of positive selection and very few orthogroups with either one or two genes undergoing  
190 positive selection.

191

### 192 ***Cytochrome P450 gene family diversity across green plants***

193 Cytochrome P450s (CYP450s) can be found across the major lineages of life but are most  
194 diverse in green plants. These enzymes are critical to plant metabolism and have diversified to  
195 become one of the largest metabolism-related enzyme families found in Viridiplantae<sup>23</sup>. We  
196 identified CYP450 genes from 40 green plant species with multiple representatives from each  
197 major lineage, plus three red and brown algae (Rhodophyta and Phaeophyceae, respectively) as  
198 outgroups, and classified them into previously identified CYP450 subfamilies (Supplementary  
199 Table 12). In total, we identified 11,463 CYP450 genes across these 43 species with the highest  
200 CYP450 diversity in hexaploid wheat, *Triticum aestivum*. On average, angiosperms contained 401  
201 CYP450 genes, although this sampling does include recent polyploids such as *T. aestivum*. The  
202 gymnosperms had a mean count of 344 CYP450s, ferns had 181, the single lycophyte sample  
203 *Selaginella moellendorffii* had 308, bryophytes had 151, charophyte algae had 31, and chlorophyte  
204 algae had 17; within ferns, the two water ferns, *Azolla* and *Salvinia*, had 155 and 80 total CYP450  
205 genes, respectively, and *Ceratopteris* had 309. The largest difference in CYP450 subfamily  
206 diversity between *Ceratopteris* and the water ferns was in CYP704B (58 in *Ceratopteris*, 7 in  
207 *Azolla*, 11 in *Salvinia*), which encode omega fatty acid hydroxylases, enzymes essential for spore

208 wall polymers<sup>24</sup>. Interestingly, this subfamily has even lower diversity in seed plants, with a mean  
209 count of 1.9 CYP704B genes.

210 Independent of the CYP450 subfamilies, which were largely identified from angiosperm  
211 reference genes, we constructed a CYP450 phylogeny from 14 of these taxa, with representatives  
212 from each major green plant lineage (Supplementary Figure 11). While the early-diverging  
213 CYP450 clades have representative genes from diverse green plant taxa, it is clear that lineage-  
214 specific subfamilies are prevalent especially in more recently diverged clades of the CYP450  
215 genes.

216

### 217 ***Revitalizing the C-Fern Curriculum***

218 *Ceratopteris* is an exemplary model for teaching plant development and genetics because  
219 it has both independent gametophytic and sporophytic life stages, clearly demonstrating the  
220 alternation of generations<sup>25,26</sup> typical of all land plants. Students can easily mutagenize the haploid  
221 spores using EMS or X-rays and see the resulting mutant phenotypes in the haploid  
222 gametophytes<sup>27</sup>. The ability of ferns to undergo intragametophytic selfing (egg fertilized by sperm  
223 from a single gametophyte) allows students to produce completely homozygous sporophytes in  
224 which any mutant phenotype will also be apparent in the diploid life cycle stage. In addition, true-  
225 breeding mutant inbred lines can be maintained long term or can easily be crossed with other  
226 genotypes. With the ease and low costs of sequencing, undergraduate students can identify mutant  
227 phenotypes in *Ceratopteris*, isolate RNA, prepare libraries, send the libraries off for sequencing,  
228 and ultimately receive training in how to map RNA-seq data onto a reference genome within a  
229 semester. *Ceratopteris* is also capable of undergoing apogamy (a haploid sporophyte forms from  
230 gametophytic tissue without fertilization) and apospory (diploid gametophytes form from  
231 sporophytic tissue), readily producing polyploid individuals and essentially permitting virtually  
232 every means of plant reproduction with this single species<sup>28,29</sup>. The genome assembly and the  
233 sequenced doubled haploid F<sub>2</sub> mapping population of *Ceratopteris* provide the resources and  
234 techniques to ensure that *Ceratopteris* and the C-Fern Curriculum will be an important model  
235 system for teaching plant development, genetics, genomics, breeding, physiology, and  
236 bioinformatics for years to come.

237

- 239 1. Ma, L. Q. *et al.* A fern that hyperaccumulates arsenic. *Nature* **409**, 579 (2001).
- 240 2. Deng, F. *et al.* Metalloid hazards: from plant molecular evolution to mitigation strategies.
- 241 *J. Hazard. Mater.* **409**, 124495 (2021).
- 242 3. Talebi, M., Tabatabaei, B. E. S. & Akbarzadeh, H. Hyperaccumulation of Cu, Zn, Ni, and
- 243 Cd in *Azolla* species inducing expression of methallothionein and phytochelatin synthase
- 244 genes. *Chemosphere* **230**, 488–497 (2019).
- 245 4. Praveen, A. & Pandey, V. C. Pteridophytes in phytoremediation. *Environ. Geochem.*
- 246 *Health* 1–13 (2019).
- 247 5. Bora, M. S., Gogoi, N. & Sarma, K. P. Tolerance mechanism of cadmium in *Ceratopteris*
- 248 *pteridoides*: Translocation and subcellular distribution. *Ecotoxicol. Environ. Saf.* **197**,
- 249 110599 (2020).
- 250 6. Thomine, S., Wang, R., Ward, J. M., Crawford, N. M. & Schroeder, J. I. Cadmium and
- 251 iron transport by members of a plant metal transporter family in *Arabidopsis* with
- 252 homology to Nramp genes. *Proc. Natl. Acad. Sci.* **97**, 4991–4996 (2000).
- 253 7. Zumajo-Cardona, C., Pabón-Mora, N. & Ambrose, B. A. The evolution of euAPETALA2
- 254 genes in vascular plants: from plesiomorphic roles in sporangia to acquired functions in
- 255 ovules and fruits. *Mol. Biol. Evol.* **38**, 2319–2336 (2021).
- 256 8. Kim, S., Soltis, P. S., Wall, K. & Soltis, D. E. Phylogeny and Domain Evolution in the
- 257 APETALA2-like Gene Family. *Mol. Biol. Evol.* **23**, 107–120 (2006).
- 258 9. Zumajo-Cardona, C. & Pabón-Mora, N. Evolution of the APETALA2 gene lineage in
- 259 seed plants. *Mol. Biol. Evol.* **33**, 1818–1832 (2016).
- 260 10. Katoh, K. & Standley, D. M. MAFFT multiple sequence alignment software version 7:
- 261 improvements in performance and usability. *Mol. Biol. Evol.* **30**, 772–780 (2013).
- 262 11. Akaike, H. Stochastic theory of minimal realization. *IEEE Trans. Automat. Contr.* **19**,
- 263 667–674 (1974).
- 264 12. Darriba, D., Taboada, G. L., Doallo, R. & Posada, D. jModelTest 2: more models, new
- 265 heuristics and parallel computing. *Nat. Methods* **9**, 772 (2012).
- 266 13. Stamatakis, A. RAxML version 8: a tool for phylogenetic analysis and post-analysis of
- 267 large phylogenies. *Bioinforma.* **30**, 1312–1313 (2014).
- 268 14. Altschul, S. *et al.* Gapped BLAST and PSI-BLAST: a new generation of protein database
- 269 search programs. *Nucleic Acids Res* **25**, (1997).
- 270 15. Kumar, S., Stecher, G., Li, M., Knyaz, C. & Tamura, K. MEGA X: molecular
- 271 evolutionary genetics analysis across computing platforms. *Mol. Biol. Evol.* **35**, 1547
- 272 (2018).
- 273 16. Babicki, S. *et al.* Heatmapper: web-enabled heat mapping for all. *Nucleic Acids Res.* **44**,
- 274 W147–W153 (2016).
- 275 17. Klekowski, E. & Baker, H. Evolutionary Significance of Polyploidy in the Pteridophyta.
- 276 *Science* **153**, 305–307 (1966).
- 277 18. Sessa, E. B. & Der, J. P. Evolutionary genomics of ferns and lycophytes. in *Advances in*
- 278 *Botanical Research* **78**, 215–254 (Elsevier, 2016).
- 279 19. Emms, D. M. & Kelly, S. OrthoFinder: solving fundamental biases in whole genome
- 280 comparisons dramatically improves orthogroup inference accuracy. *Genome Biol.* **16**, 157
- 281 (2015).
- 282 20. Vandepoele, K. *et al.* Genome-wide analysis of core cell cycle genes in *Arabidopsis*. *Plant*
- 283 *Cell* **14**, 903–916 (2002).



- 284 21. De Bie, T., Cristianini, N., Demuth, J. P. & Hahn, M. W. CAFE: a computational tool for  
285 the study of gene family evolution. *Bioinformatics* **22**, 1269–1271 (2006).
- 286 22. Edgar, R. C. MUSCLE: a multiple sequence alignment method with reduced time and  
287 space complexity. *BMC Bioinformatics* **5**, 1–19 (2004).
- 288 23. Nelson, D. & Werck-Reichhart, D. A P450-centric view of plant evolution. *Plant J.* **66**,  
289 194–211 (2011).
- 290 24. Morant, M. *et al.* CYP703 is an ancient cytochrome P450 in land plants catalyzing in-  
291 chain hydroxylation of lauric acid to provide building blocks for sporopollenin synthesis  
292 in pollen. *Plant Cell* **19**, 1473–1487 (2007).
- 293 25. Spiro, M. D. & Knisely, K. I. Alternation of generations and experimental design: a  
294 guided-inquiry lab exploring the nature of the her1 developmental mutant of *Ceratopteris*  
295 *richardii* (C-Fern). *CBE—Life Sci. Educ.* **7**, 82–88 (2008).
- 296 26. Hickok, L. G., Warne, T. R., Baxter, S. L. & Melear, C. T. Education: Sex and the C-Fern:  
297 Not just another life cycle. *Bioscience* **48**, 1031–1037 (1998).
- 298 27. Hickok, L. G., Warne, T. R. & Slocum, M. K. *Ceratopteris richardii*: applications for  
299 experimental plant biology. *Am. J. Bot.* **74**, 1304–1316 (1987).
- 300 28. Hickok, L. G. Apogamy and somatic restitution in the fern *Ceratopteris*. *Am. J. Bot.* **66**,  
301 1074–1078 (1979).
- 302 29. DeYoung, B., Weber, T., Hass, B. & Banks, J. A. Generating Autotetraploid Sporophytes  
303 and Their Use in Analyzing Mutations Affecting Gametophyte Development in the Fern  
304 *Ceratopteris*. *Genetics* **147**, 809 LP – 814 (1997).
- 305  
306  
307

308  
309  
310

### SUPPLEMENTARY FIGURES

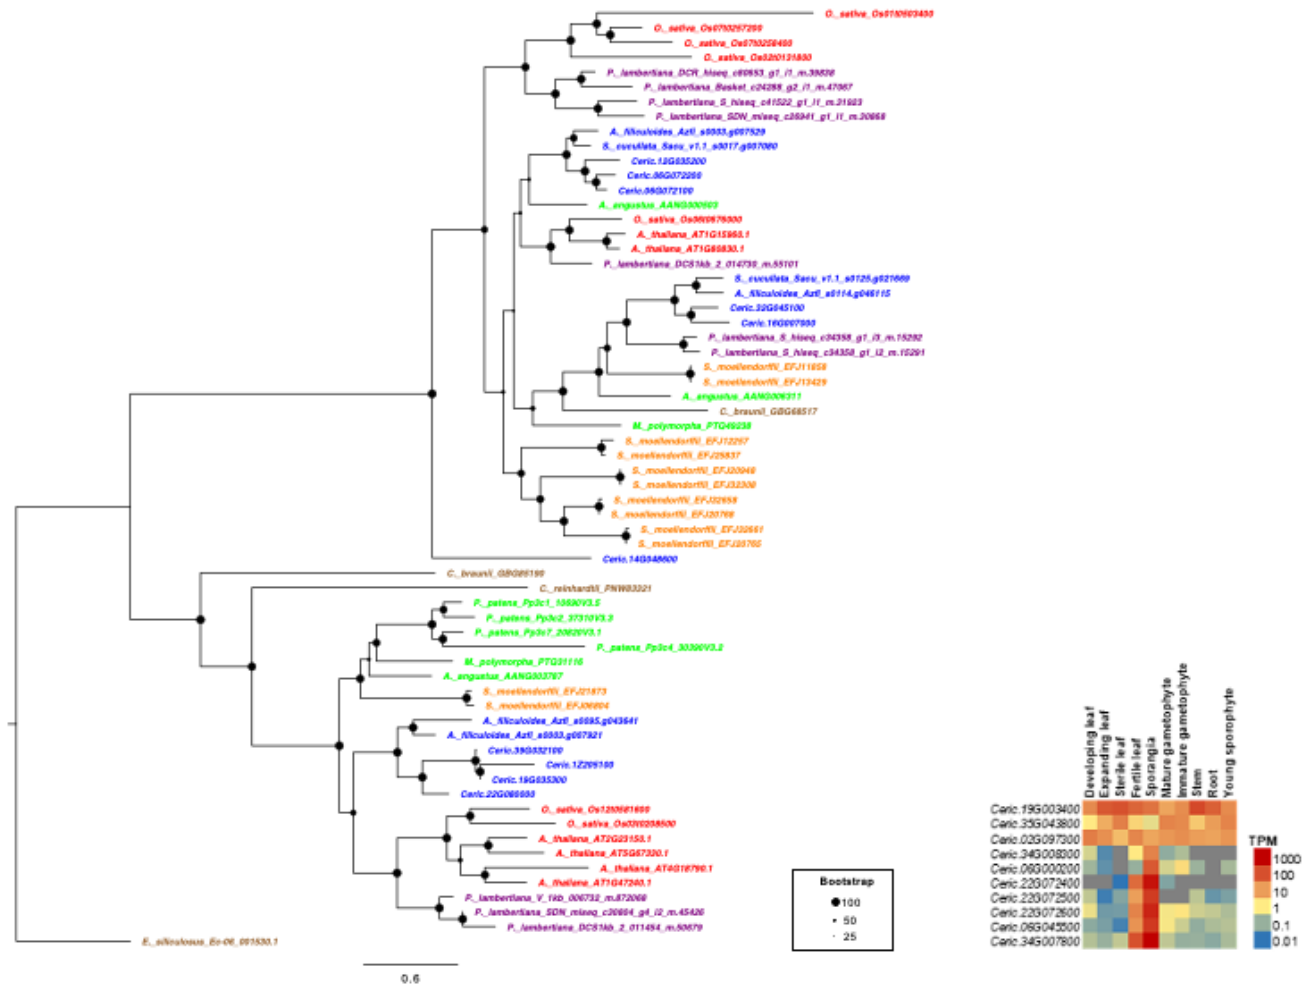

311  
312  
313  
314  
315  
316

**Supplementary Fig. 1 Phylogeny of NRAMP metal-ion transporter gene family and *Ceratopteris* NRAMP gene expression.** Angiosperm genes are red, gymnosperm genes are purple, fern genes are blue, lycophyte genes are orange, bryophyte genes are green, and algal genes are brown.

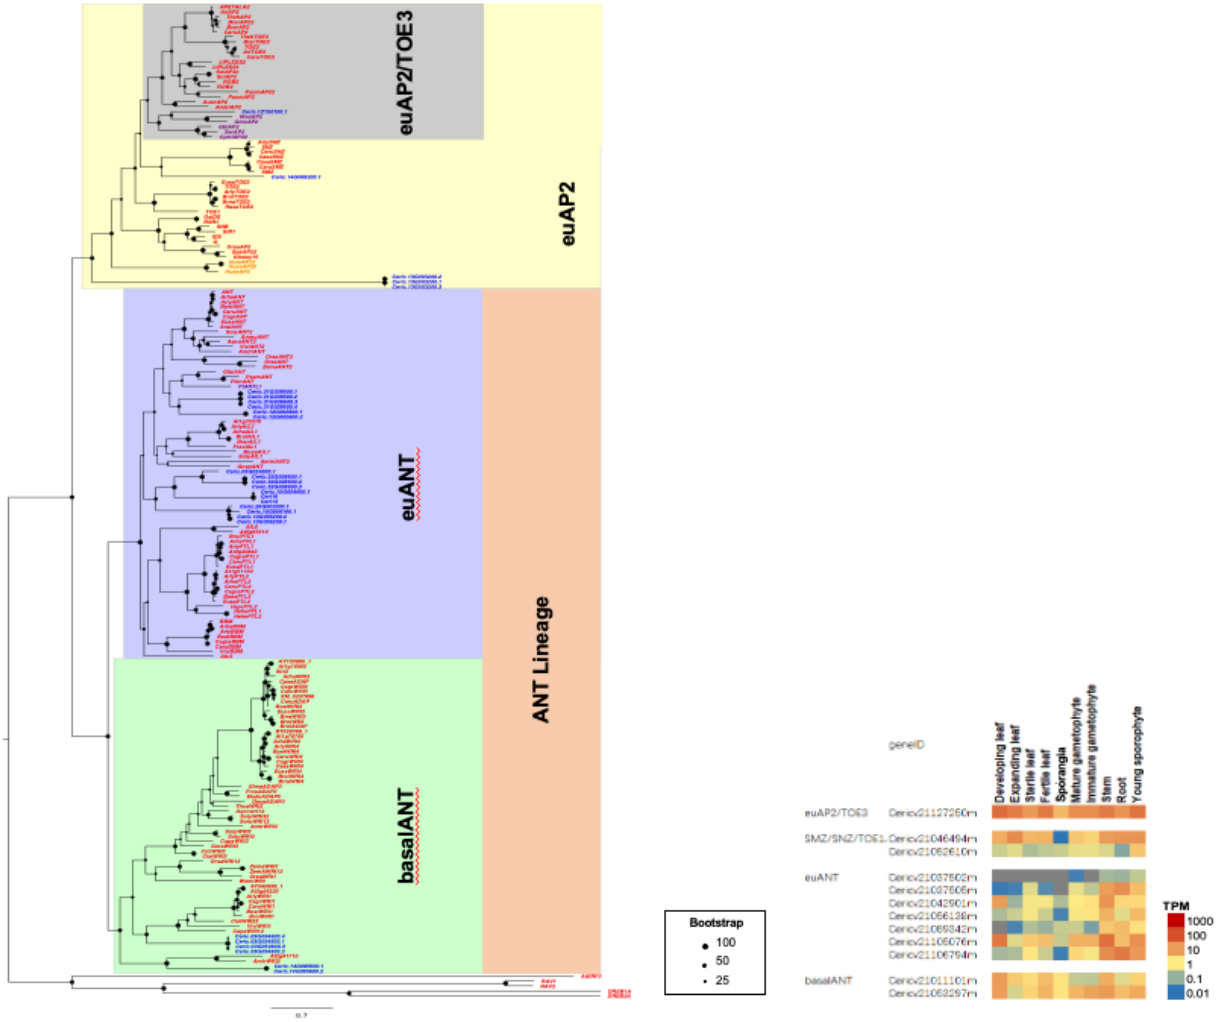

317  
 318 **Supplementary Fig. 2 Phylogeny of the *APETALA2/ETHYLENE RESPONSIVE FACTOR***  
 319 **(*AP2/ERF*) across land plants and expression in *Ceratopteris*.** Angiosperm genes are red,  
 320 gymnosperm genes are purple, fern genes are blue, and lycophyte genes are orange.  
 321



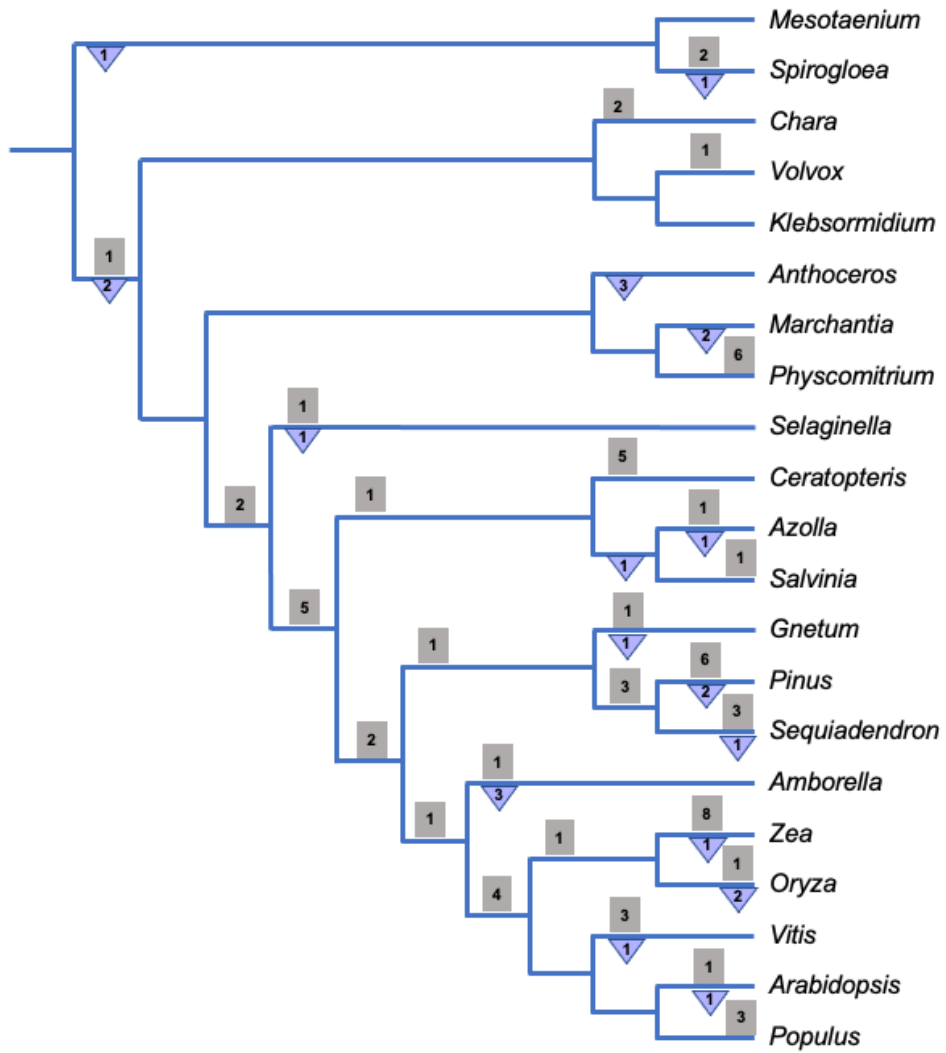

329  
 330 **Supplementary Fig. 4 Expansion and contraction in copy number of cell cycle-related genes**  
 331 **across green plants.** Light purple triangles indicate contractions; grey squares show expansions.

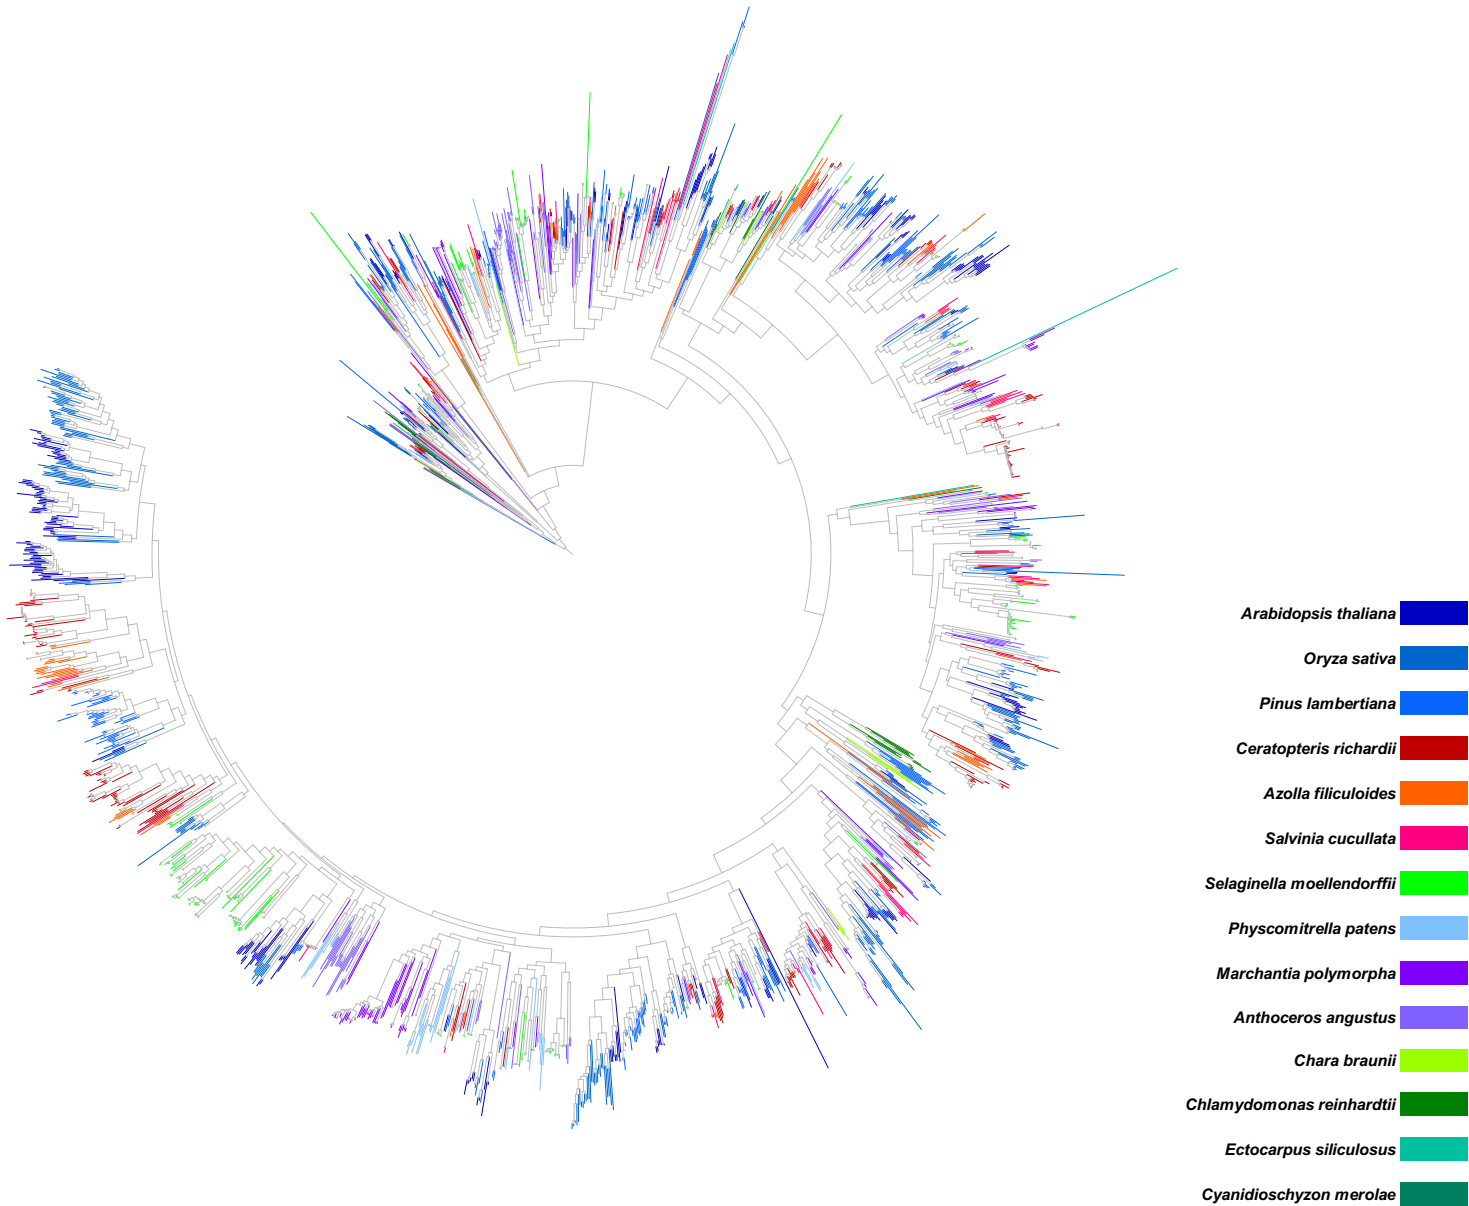

332 **Supplementary Fig. 5 CYP450 gene diversity and evolution across green plants.** The color-  
 333 coding of the 14 green plant taxa spanning 2,193 genes is found in the figure legend.  
 334
